# Supplementary material
Source: publisher figshare collection journal article supplement (https://karger.figshare.com/ndownloader/files/15240431)

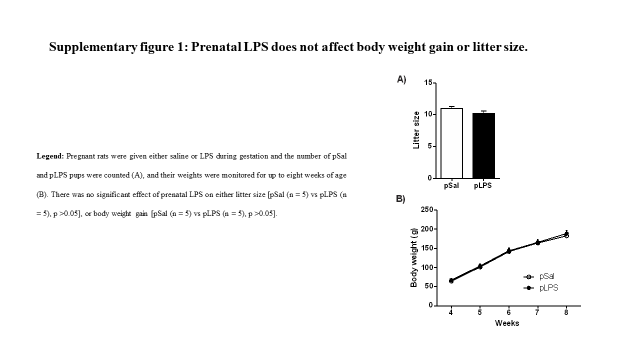


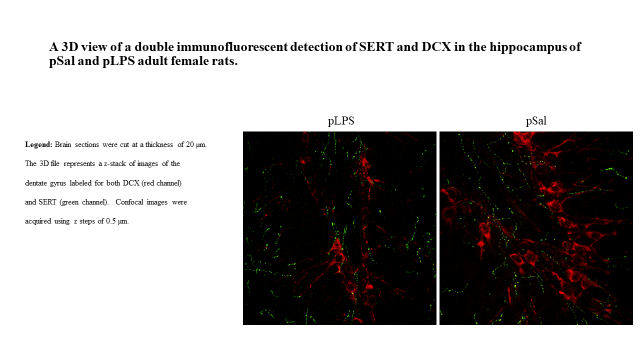
**Supplementary Fig. 2**

Supplement: Supplementary file 1 [file 15240431]
